# Supplementary material for: Neurological symptoms and comorbidity profile of hospitalized patients with COVID-19
Source: PubMed Central journal article supplement (PMC10033191; doi:10.1055/s-0043-1761433), 2023-03-22
Supplement: 10-1055-s-0043-1761433-s220042.pdf [file 10-1055-s-0043-1761433-s220042.pdf]

**SUPPLEMENTARY MATERIAL****Supplementary Table S1** In-hospital standard of care of hospitalized patients with COVID-19

|                                                     | OD            |              |               | p-value     |
|-----------------------------------------------------|---------------|--------------|---------------|-------------|
|                                                     | Overall       | without      | with          |             |
|                                                     | (N = 100)     | (N = 56)     | (N = 44)      |             |
| <b>Administration of medications, %</b>             |               |              |               |             |
| Intravenous antibiotics                             | 95            | 96.4         | 93.2          | 0.46        |
| Intravenous heparin                                 | 18            | 16.1         | 20.5          | 0.57        |
| Systemic corticosteroids                            | 11            | 16.1         | 4.5           | 0.06        |
| Antiviral (oseltamivir)                             | 6             | 1.8          | 11.4          | <b>0.04</b> |
| <b>Highest level of supplemental O2 required, %</b> |               |              |               |             |
| None                                                | 7             | 7.1          | 6.8           |             |
| Non-invasive oxygen therapy <sup>1</sup>            | 71            | 71.4         | 70.5          |             |
| Invasive mechanical ventilation                     | 22            | 21.4         | 22.7          |             |
| <b>Need for vasopressor<sup>2</sup>,%</b>           | 22            | 21.4         | 22.7          | 0.87        |
| <b>Venous TEE, %</b>                                | 17            | 16.1         | 18.2          | 0.78        |
| <b>ICU requirement, %</b>                           | 62            | 64.3         | 59.1          | 0.59        |
| <b>Clinical outcomes, %</b>                         |               |              |               |             |
| Recovery                                            | 85            | 85.7         | 84.1          |             |
| Death                                               | 15            | 14.3         | 15.9          | 0.82        |
| <b>Hospitalization</b>                              |               |              |               |             |
| Delay, days <sup>3</sup>                            | 5.9 ± 4.73    | 5.27 ± 4.52  | 6.7 ± 4.92    | 0.13        |
| Duration, days                                      | 17.93 ± 12.48 | 17.3 ± 10.76 | 18.73 ± 14.46 | 0.57        |

**Abbreviations:** O2, oxygen; TEE, thromboembolic event; ICU, intensive care unit; OD, olfactory dysfunction.

**Notes:** Values expressed as the mean ± standard deviation or percentage (%). Bold numbers indicate statistical significance. \*p-value <0.05 from analysis of variance and the Pearson chi-squared or Fisher exact tests within group the without and with OD. Olfactory dysfunction = subjective anosmia/hyposmia. <sup>1</sup>Nasal cannula, venti mask and non-rebreather. <sup>2</sup>Due to hypovolemic, septic and cardiogenic shock. <sup>3</sup>Between symptom onset and admission.
